# Supplementary material for: On-demand hydrogen production from formic acid by light-active dinuclear iridium catalysts
Source: Royal Society of Chemistry journal article supplement (doi:10.1039/d0cc00704h), 2020-01-01
Supplement: d0cc00704h1.pdf [file d0cc00704h1.pdf]

## Supporting Information

# On-Demand Hydrogen Production from Formic Acid by Light-Active Dinuclear Iridium Catalysts

Yuki Sofue, Kotohiro Nomura, Akiko Inagaki\*

Department of Chemistry, Graduate School of Science, Tokyo Metropolitan University, Minami-Osawa 1-1, Hachioji, Tokyo, 192-0397.

|                                                                                                                                                                       |     |
|-----------------------------------------------------------------------------------------------------------------------------------------------------------------------|-----|
| 1. Experimental Procedures for the synthesis and characterization of <b>1d</b> , <b>1e</b> , <b>A<sup>a</sup></b> , <b>B<sup>a</sup></b> , and <b>A<sup>c</sup></b> . | S2  |
| 2. Figure S1. <sup>1</sup> H NMR spectra of <b>1d</b> .                                                                                                               | S4  |
| Figure S2. <sup>1</sup> H NMR spectra of <b>1d</b> (hydride region).                                                                                                  | S4  |
| Figure S3. <sup>31</sup> P NMR spectrum of <b>1d</b> .                                                                                                                | S5  |
| Figure S4. <sup>13</sup> C NMR spectrum <b>1e</b> .                                                                                                                   | S5  |
| 3. Figure S5. <sup>1</sup> H NMR spectrum of <b>1e</b> (hydride region).                                                                                              | S6  |
| Figure S6. <sup>31</sup> P NMR spectra of <b>1e</b> .                                                                                                                 | S7  |
| Figure S7. <sup>13</sup> C NMR spectrum of <b>1e</b> .                                                                                                                | S7  |
| 4. Figure S8. Figure S8. UV-vis absorption spectra of <b>1a-e</b> .                                                                                                   | S8  |
| 5. Figure S9. ESI-MS spectra of the reaction mixture of the photocatalytic reaction by <b>1a</b> .                                                                    | S8  |
| 6. Figure S10. <sup>1</sup> H NMR spectra of <b>A<sup>c</sup></b> .                                                                                                   | S9  |
| Figure S11. <sup>1</sup> H NMR spectra of <b>A<sup>c</sup></b> (hydride region).                                                                                      | S9  |
| Figure S12. <sup>31</sup> P NMR spectra of <b>A<sup>c</sup></b> .                                                                                                     | S10 |
| Figure S13. <sup>13</sup> C NMR spectra of <b>A<sup>c</sup></b> .                                                                                                     | S10 |
| 7. Details of X-ray Structural Determinations.                                                                                                                        | S11 |
| 8. Figure S14. ORTEP diagram of complex <b>B<sup>b</sup></b> .                                                                                                        | S12 |
| 9. Table S1. Crystal data and structure refinement for <b>B<sup>b</sup></b> .                                                                                         | S13 |
| 10. Figure S15. UV-vis absorption spectra of <b>1a</b> , <b>A<sup>a</sup></b> , and <b>B<sup>a</sup></b> .                                                            | S14 |

## Experimental Procedures

**General.** All experiments were carried out under a nitrogen atmosphere using standard Schlenk techniques. All solvents were treated with appropriate drying agents, distilled, and stored under nitrogen atmosphere. All the chemicals were purchased from common commercial suppliers.  $^1\text{H}$  (400 MHz),  $^{13}\text{C}$  (100 MHz), and  $^{31}\text{P}$  (162 MHz) spectra were acquired on a JEOL JNM-AL400 FT-NMR spectrometers. Solvents for NMR measurements ( $\text{CD}_3\text{OD}$ ,  $(\text{CD}_3)_2\text{CO}$ ,  $\text{CD}_2\text{Cl}_2$ ,  $\text{THF-}d_8$ ,  $\text{CD}_3\text{NO}_2$ ) were dried over molecular sieves, degassed, and stored under  $\text{N}_2$  atmosphere. UV-vis absorption spectra were obtained on a JASCO V-670 spectrometer.

### Preparation and spectral data of **1d**.

To an acetone (2.0 mL) solution of  $[\text{Ir}(\text{cod})_2]\text{BF}_4$  (49.6 mg, 0.10 mmol), a THF solution (1.2 mL) of xylBINAP (2,2'-Bis[di(3,5-xylyl)phosphino]-1,1'-binaphthyl) (7.27 mg, 0.10 mmol) was added. After stirring for 1.5 h, the red-purple solution was concentrated under vacuum and  $\text{Et}_2\text{O}$  was added for recrystallization.  $[\text{Ir}(\text{xylBINAP})(\text{cod})]\text{BF}_4$  was obtained as red-purple crystal (108.8 mg, 0.097 mmol, 98%).

A methanol (1 mL) solution of  $[\text{Ir}(\text{xylBINAP})(\text{cod})]\text{BF}_4$  (40.0 mg, 0.035 mmol) was degassed by freeze-pump-thaw method, and then 1 atm  $\text{H}_2$  gas was introduced. After stirring the solution for 3 h, the solution became cloudy, and  $\text{Et}_2\text{O}$  was directly added to isolate **1d** as yellow powder (27.9 mg, 0.014 mmol, 82%).

$^1\text{H}$  NMR (400 MHz,  $\text{CD}_2\text{Cl}_2$ ,  $\delta$  / ppm) 8.21 (d,  $J$  = 6.0 Hz, 4 H, Ph + naphthyl), 7.80 (brs, 4 H), 7.57 (d,  $J$  = 8.0 Hz, 2 H), 7.49 (d,  $J$  = 8.0 Hz, 2 H), 7.42 (d,  $J$  = 8.0 Hz, 2 H), 7.27-7.39 (m, 6 H), 7.22 (t,  $J$  = 6.6 Hz, 4 H), 7.18-7.05 (m, 8 H), 6.86-7.03 (m, 8 H), 6.66 (s, 2 H), 6.27 (s, 2 H), 5.93 (s, 2 H), 2.43 (s, 12 H,  $\text{C}_6\text{H}_3\text{-}2\text{CH}_3$ ), 2.16 (s, 12 H,  $\text{C}_6\text{H}_3\text{-}2\text{CH}_3$ ), 1.79 (s, 12 H,  $\text{C}_6\text{H}_3\text{-}2\text{CH}_3$ ), 0.92 (s, 12 H,  $\text{C}_6\text{H}_3\text{-}2\text{CH}_3$ ), -6.78 (d,  $J$  = 74.4 Hz, 2 H, Ir-H), -7.78 (t,  $J$  = 63.8 Hz, 1 H, Ir-H), -21.12 (brs, 2 H, Ir-H)

$^{31}\text{P}\{^1\text{H}\}$  NMR (162 MHz, acetone- $d_6$ ,  $\delta$  / ppm) 34.4, 22.5 (br).

$^{13}\text{C}$  (100MHz,  $\text{CD}_2\text{Cl}_2$ ,  $\delta$  / ppm) 139.0–122.0 (*Ar*), 20.22 (*Ar-CH}\_3*), 20.13 (*Ar-CH}\_3*), 20.04 (*Ar-CH}\_3*), 19.03 (*Ar-CH}\_3*).

Anal. Calcd. for  $\text{C}_{104}\text{H}_{101}\text{Ir}_2\text{P}_4\text{BF}_4\cdot\text{CH}_2\text{Cl}_2$ : C, 62.09; H, 5.11. Found: C, 62.00; H, 5.30.

### Preparation and spectral data of **1e**.

To a acetone (2.0 mL) solution of  $[\text{Ir}(\text{cod})_2]\text{BF}_4$  (46.5 mg, 0.094 mmol), a THF (1.5 mL) solution of DADMP-BINAP(2,2'-Bis[bis(4-dimethylamino-3,5-dimethylphenyl)phosphino]-1,1'-binaphthyl) (81.0 mg, 0.089 mmol) was added. After stirring for 1.5 h, the red-purple solution was concentrated under vacuum and  $\text{Et}_2\text{O}$  and hexane was added for precipitation.  $[\text{Ir}(\text{DADMP-BINAP})(\text{cod})]\text{BF}_4$  was obtained as red powder (113.6 mg, 0.087 mmol, 97%).

A methanol (1 mL) solution of  $[\text{Ir}(\text{DADMP-BINAP})(\text{cod})]\text{BF}_4$  (61.1 mg, 0.047 mmol) was degassed by freeze-pump-thaw method, and then 1 atm  $\text{H}_2$  gas was introduced. After stirring the solution for 3 h,  $\text{Et}_2\text{O}$  and hexane was added to isolate **1e** as yellow powder (47.8 mg, 0.021 mmol, 89%).

$^1\text{H}$  NMR (400 MHz,  $\text{MeOH-}d_4$ ,  $\delta$  / ppm) 8.33 (d,  $J$  = 12.0 Hz, 4 H, Ph + naphthyl), 7.60-7.69 (m, 4 H), 7.47 (d,  $J$  = 8.0 Hz, 2 H), 7.35-7.44 (m, 6 H), 7.14-7.43 (m, 12 H), 6.96 (s, 2 H), 6.89 (d,  $J$  = 4.8 Hz, 2 H), 6.70 (s, 4 H), 7.18-7.05 (m, 8 H), 6.86-7.03 (m, 8 H), 6.66 (s, 2 H), 6.27 (s, 2 H), 5.93 (s, 2 H), 2.93 (s, 26 H,  $\text{N-}2\text{CH}_3$ ), 2.65 (s, 12 H,  $\text{N-}2\text{CH}_3$ ), 2.49 (s, 12 H,  $\text{N-}2\text{CH}_3$ ), 2.29 (s, 14 H,  $\text{C}_6\text{H}_3\text{-}2\text{CH}_3$ ), 2.01 (s, 12 H,  $\text{C}_6\text{H}_3\text{-}2\text{CH}_3$ ), 1.89 (s, 12 H,  $\text{C}_6\text{H}_3\text{-}2\text{CH}_3$ ), 0.88 (brs, 10H,  $\text{C}_6\text{H}_3\text{-}2\text{CH}_3$ ), -6.92 (d,  $J$  = 74.4 Hz, 2 H, Ir-H), -7.74 (t,  $J$  = 63.8 Hz, 1 H, Ir-H), -20.95 (brs, 2 H, Ir-H)

$^{31}\text{P}\{^1\text{H}\}$  NMR (162 MHz, acetone- $d_6$ ,  $\delta$  / ppm) 34.6, 20.1 (br).

Anal. Calcd. for  $\text{C}_{120}\text{H}_{141}\text{Ir}_2\text{P}_4\text{N}_8\text{BF}_4\cdot 3\text{H}_2\text{O}$ : C, 61.47; H, 6.32; N, 4.78. Found: C, 61.14; H, 5.92; N, 4.58.

Preparation and spectral data of monoformate complex **A<sup>a</sup>**.

To a MeOH (1.5 mL) solution of **1a** (25.9 mg, 15.0 mmol), HCOOH (2.3  $\mu$ L, 4.0 eq) was added and irradiated (395 nm) for 15 minutes. The solvent was removed under reduced pressure to yield **A<sup>a</sup>** as yellow powder quantitatively.

$^1\text{H}$  NMR (400 MHz, acetone- $d_6$ ,  $\delta$  / ppm) 8.77 (d,  $J$  = 14.8 Hz, 2 H, Ar), 8.34-8.25 (m, 4 H, Ar), 7.85 (brs, 1 H, OCHO), 7.71-7.21 (m, 26 H, Ar), 7.18-7.00 (m, 14 H, Ar), 6.95-6.72 (m, 8 H, Ar), 6.65 (d,  $J$  = 7.6 Hz, 2H, Ar), 6.48 (d,  $J$  = 8.4 Hz, 2 H, Ar), 6.42 (t,  $J$  = 7.5 Hz, 2 H, Ar), 6.25 (d,  $J$  = 8.4 Hz, 2 H, Ar), 6.18 (t,  $J$  = 7.5 Hz, 2 H, Ar), -8.43 (dt,  $J_{\text{PH}}$  = 64 Hz, 2 H, Ir- $H$ ), -21.03 (m, 2 H, Ir- $H$ ).

$^{31}\text{P}\{^1\text{H}\}$  NMR (162 MHz, acetone- $d_6$ ,  $\delta$  / ppm) 15.0, 6.1.

Preparation and spectral data of monoformate complex **B<sup>a</sup>**.

Complex **1a** (40.0 mg, 23.2 mmol) was dissolved into HCOOH (0.5 mL) and irradiated (395 nm) for 6 h. The solvent was removed under reduced pressure to yield **B<sup>a</sup>** as yellow powder quantitatively.

$^1\text{H}$  NMR (400 MHz, acetone- $d_6$ ,  $\delta$  / ppm) 7.92-7.87 (m, 3 H, OCHO + Ar), 7.83-7.76 (m, 4 H, Ar), 7.66-7.47 (m, 22 H, Ar), 7.42-7.32 (m, 6 H, Ar), 7.30-7.09 (m, 5 H, Ar), 6.79-6.57 (m, 6 H, Ar), 6.53-6.43 (m, 8 H, Ar), 6.25-6.19 (m, 4 H, Ar), -13.14 (dt,  $J_{\text{PH}}$  = 58 Hz, 2 H, Ir- $H$ ), -24.70 (s, 2 H, Ir- $H$ ).

$^{31}\text{P}\{^1\text{H}\}$  NMR (162 MHz, acetone- $d_6$ ,  $\delta$  / ppm) 5.3, -9.1.

Preparation and spectral data of monoformate complex **A<sup>c</sup>**.

The monoformate complex **A<sup>c</sup>** was prepared as the same procedure as that for **A<sup>a</sup>**.

$^1\text{H}$  NMR (400 MHz, acetone- $d_6$ ,  $\delta$  / ppm) 7.97-7.25 (m, 38 H, Ar), 7.04-6.92 (m, 12 H, Ar), 6.82 (t,  $J$  = 8.0 Hz, 4H, Ar), 6.69-6.59 (m, 4 H), 6.47 (d,  $J$  = 8.0 Hz, 4 H, Ar), 6.23 (m, 2 H, Ar), 6.02(s, 2 H, methyl), 5.98 (s, 2 H, methyl), 5.85 (s, 6 H, methyl), -8.39 (dt,  $J$  = 64.2 Hz,  $J$  = 9.2 Hz, 2 H, Ir- $H$ ), -21.45 (t,  $J$  = 17.6 Hz, 2 H, Ir- $H$ ).

$^{31}\text{P}\{^1\text{H}\}$  NMR (162 MHz, acetone- $d_6$ ,  $\delta$  / ppm) 13.87 (brs), 6.17 (brs).

$^{13}\text{C}$  NMR (100.8 MHz, acetone- $d_6$ ,  $\delta$  / ppm) 174.9 (s, 1 (OCHO)), 149.7 (d,  $J_{\text{C-O}}$  = 15.3 Hz, b), 147.2 (d,  $J_{\text{C-O}}$  = 13.5 Hz, g), 146.9 (d,  $J_{\text{C-O}}$  = 14.0 Hz, g), 134.9 (d,  $J_{\text{C-P}}$  = 10.6 Hz, h), 134.6 (d,  $J_{\text{C-P}}$  = 11.5 Hz, h), 133.8(d,  $J_{\text{C-P}}$  = 8.7 Hz, h), 133.2 (d,  $J_{\text{C-P}}$  = 10.6 Hz, h), 131.5, 131.2, 130.8, 130.4, 130.2, 130.0 (s, i), 129.3-127.6 (m, d, f, j), 126.9(d,  $J_{\text{C-P}}$  = 8.7 Hz, e), 125.8 (d,  $J_{\text{C-P}}$  = 8.4 Hz, e), 125.3, 124.7, 123.8, 123.2 (s, k), 117.9, 117.2 (m, c), 107.5–107.9 (m, a), 102.2 (s, a), 102.1 (s, a).

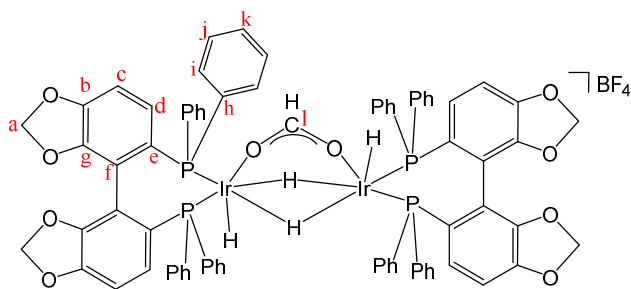

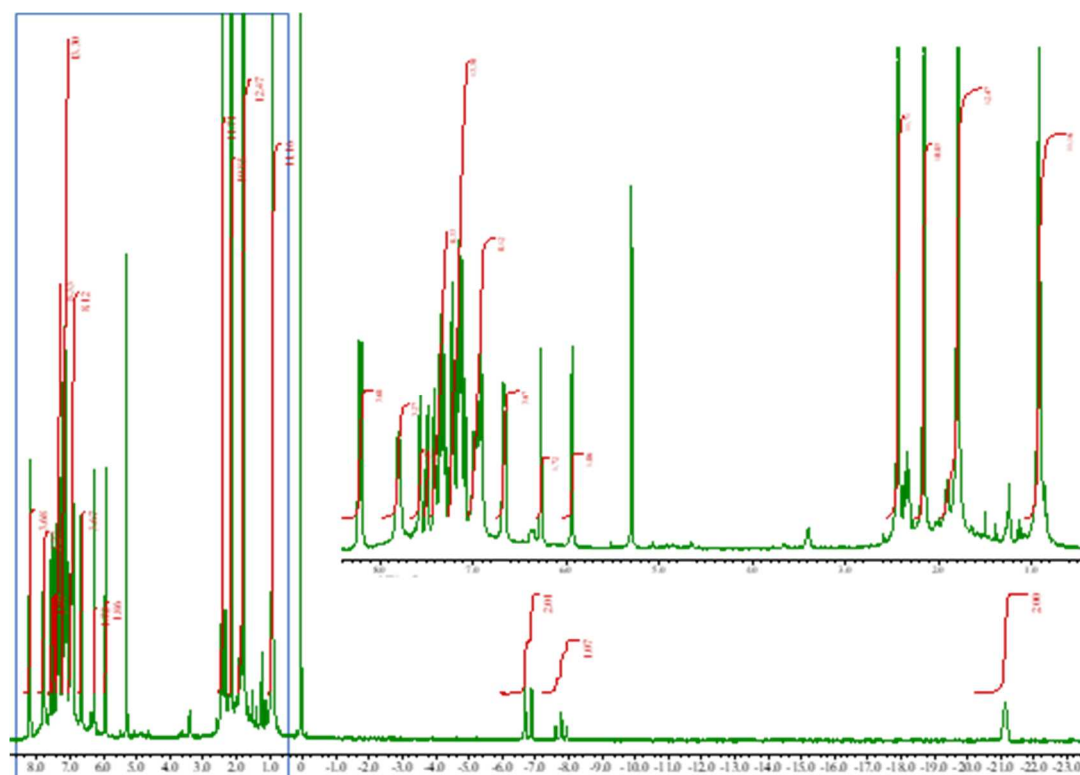

Figure S1.  $^1\text{H}$  NMR spectra of **1d** (400 MHz,  $\text{CD}_2\text{Cl}_2$ , r.t.).

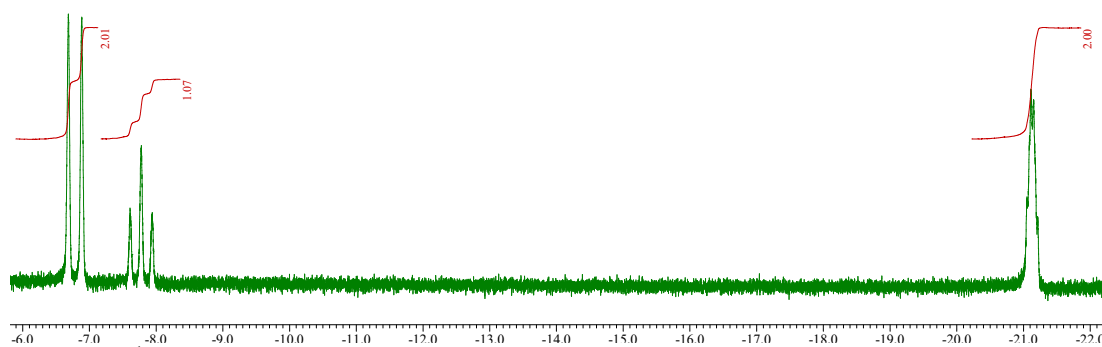

Figure S2.  $^1\text{H}$  NMR spectra of hydride region of **1d** (400 MHz,  $\text{CD}_2\text{Cl}_2$ , r.t.).

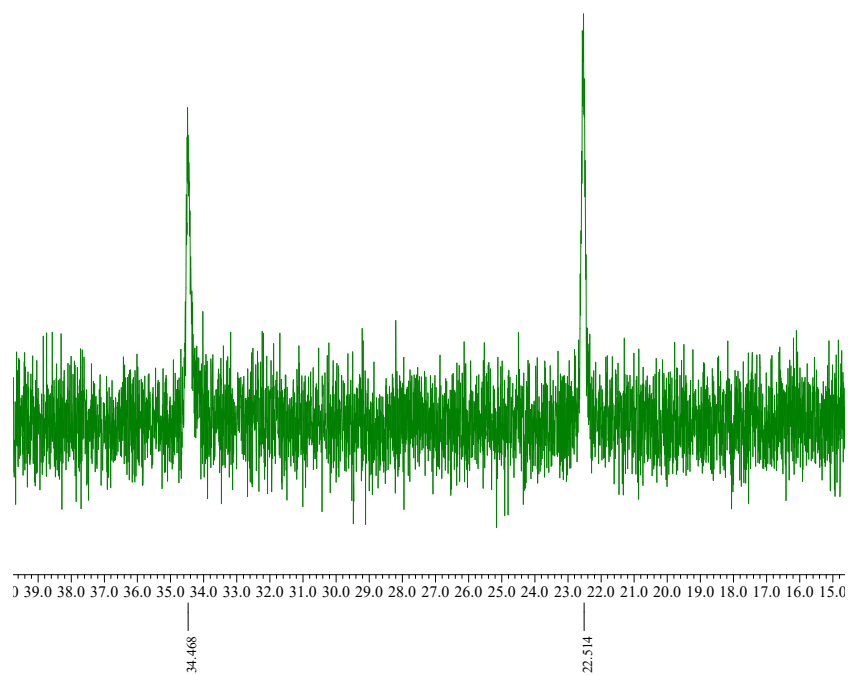

Figure S3.  $^{31}\text{P}$  NMR spectra of **1d** (161.8 MHz,  $\text{CD}_2\text{Cl}_2$ , r.t.).

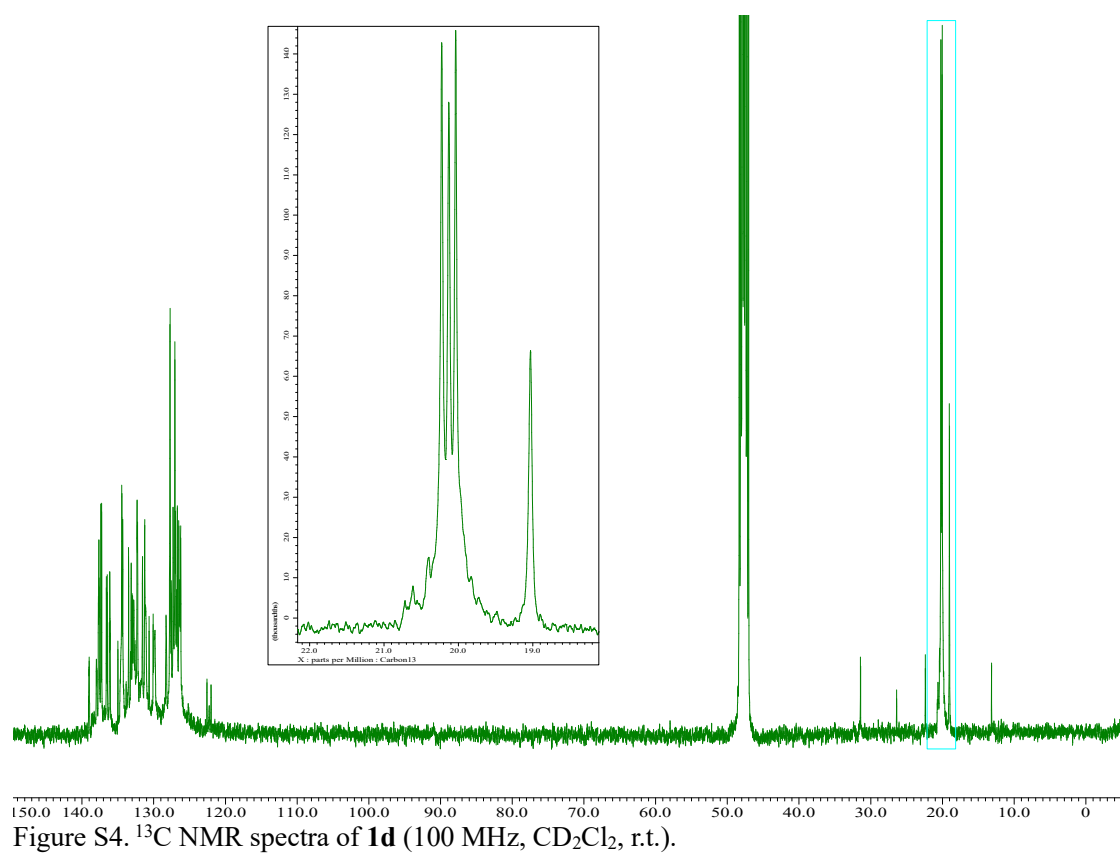

Figure S4.  $^{13}\text{C}$  NMR spectra of **1d** (100 MHz,  $\text{CD}_2\text{Cl}_2$ , r.t.).

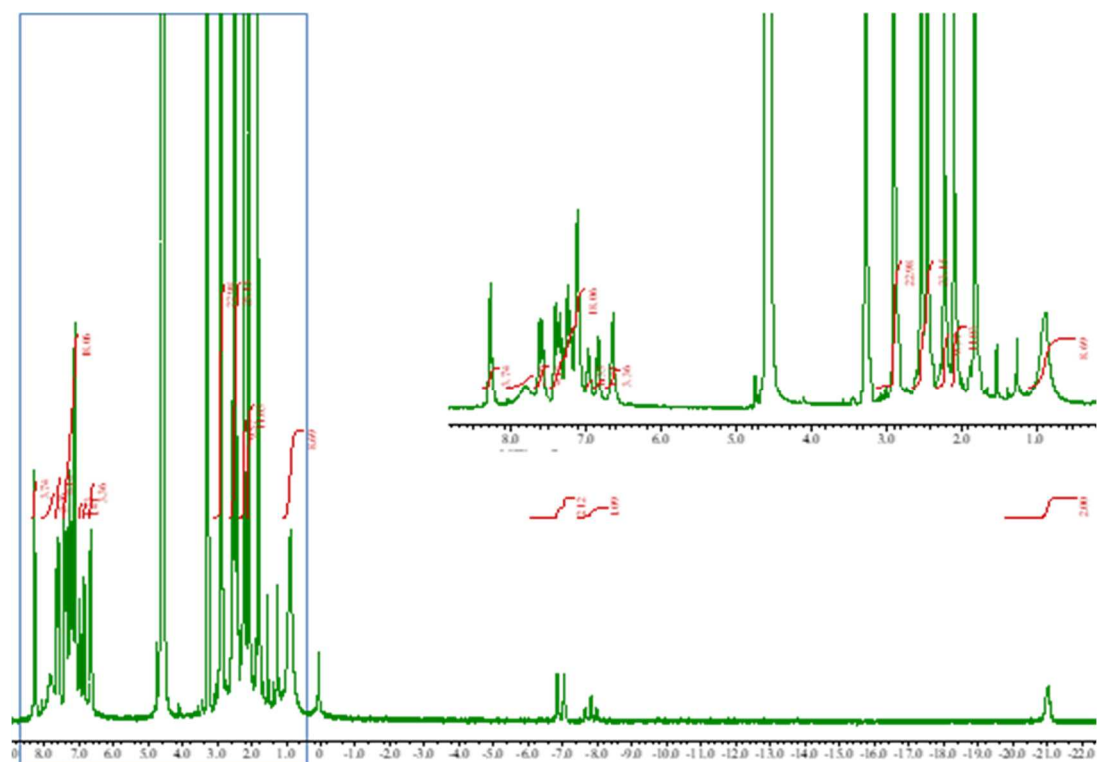

Figure S5.  $^1\text{H}$  NMR spectra of **1e** (400 MHz,  $\text{MeOH-}d_4$ , 323 K).

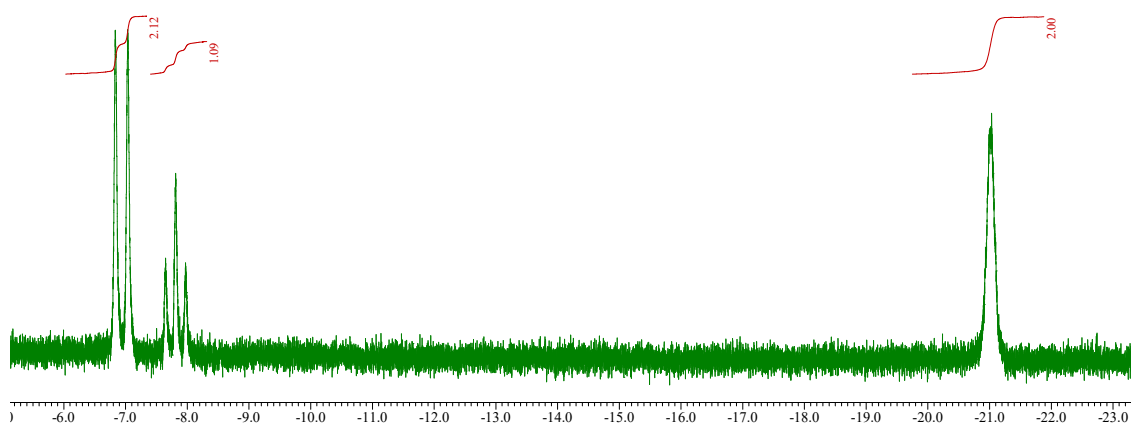

Figure S6.  $^1\text{H}$  NMR spectra of hydride region of **1e** (400 MHz,  $\text{MeOH-}d_4$ , 323 K).

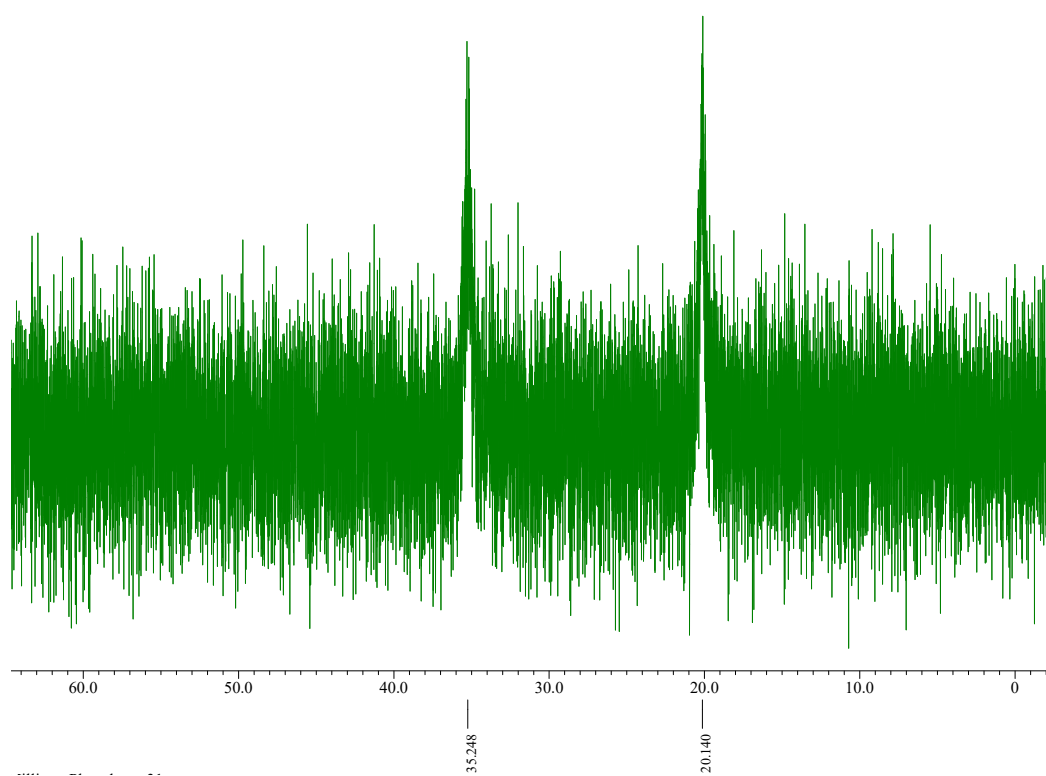

Figure S7.  $^{31}\text{P}$  NMR spectra of **1e** (161.8 MHz,  $\text{MeOH-}d_4$ , r.t.).

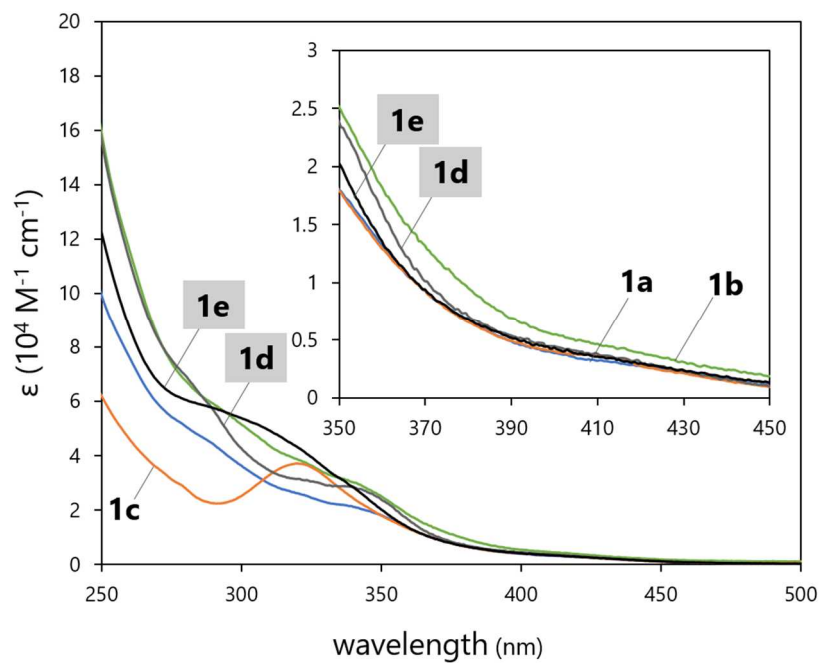

Figure S8. UV-vis absorption spectra of **1a-e** measured in  $\text{CD}_2\text{Cl}_2$  at r.t.

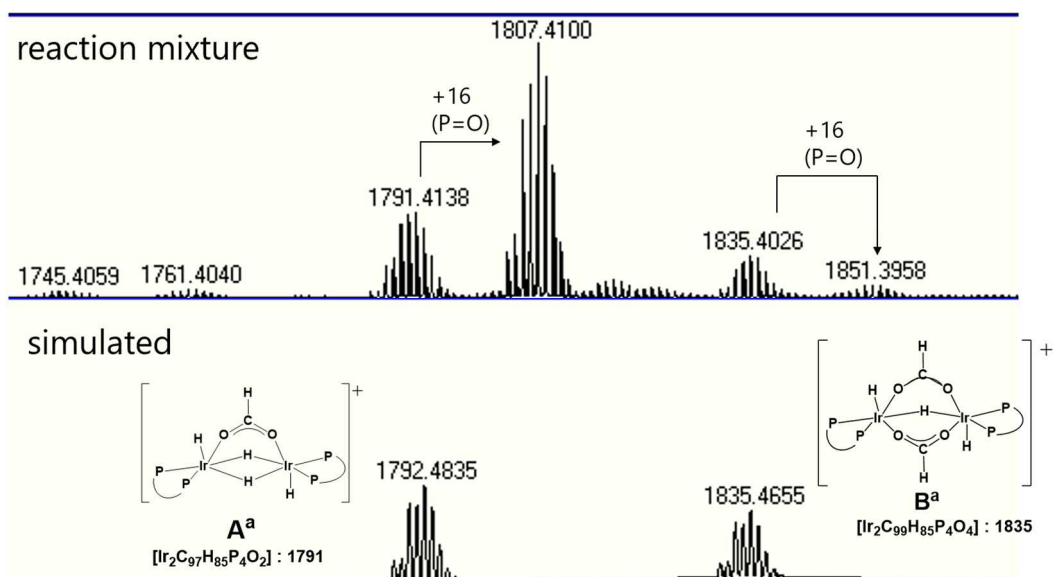

Figure S9. ESI-MS spectra of the reaction mixture of the photocatalytic reaction by **1a** ( $\text{CH}_3\text{CN}$ , r.t.).



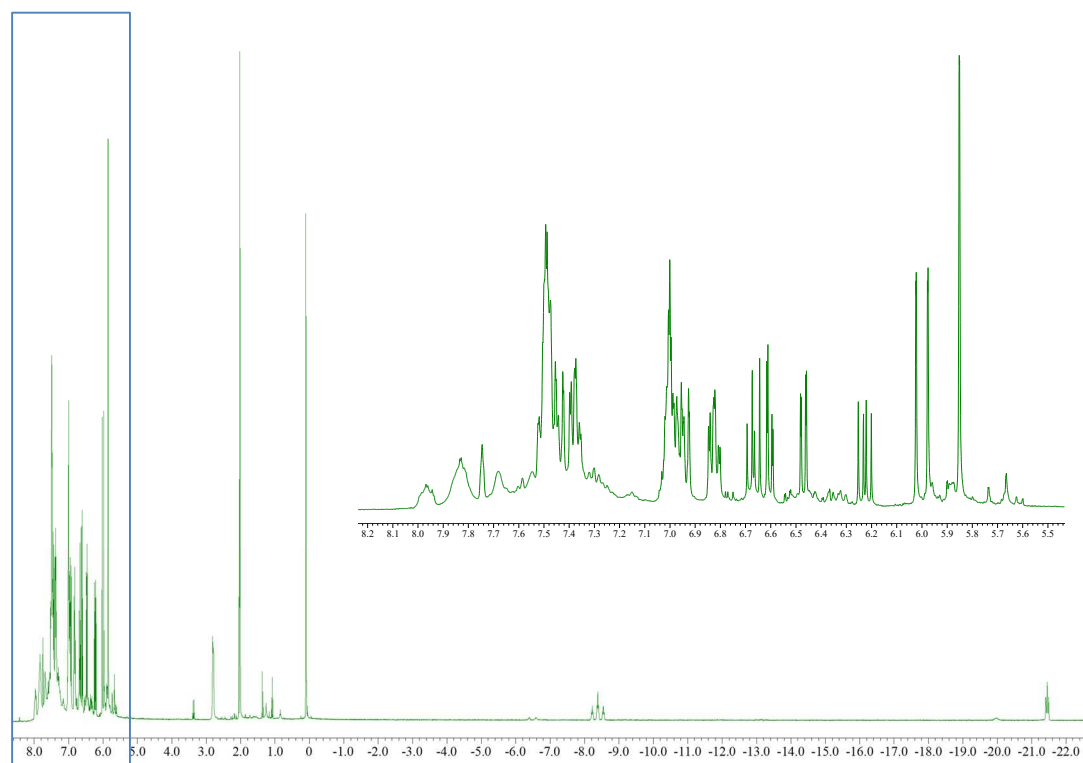

Figure S10.  $^1\text{H}$  NMR spectra of  $\text{A}^c$  (400 MHz, acetone- $d_6$ , r.t.).

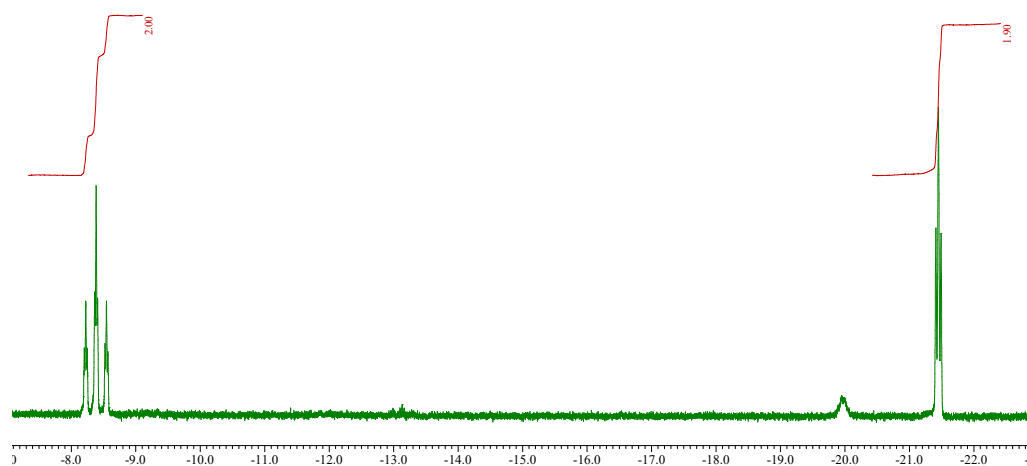

Figure S11.  $^1\text{H}$  NMR spectra of hydride region of  $\text{A}^c$  (400 MHz, acetone- $d_6$ , r.t.).

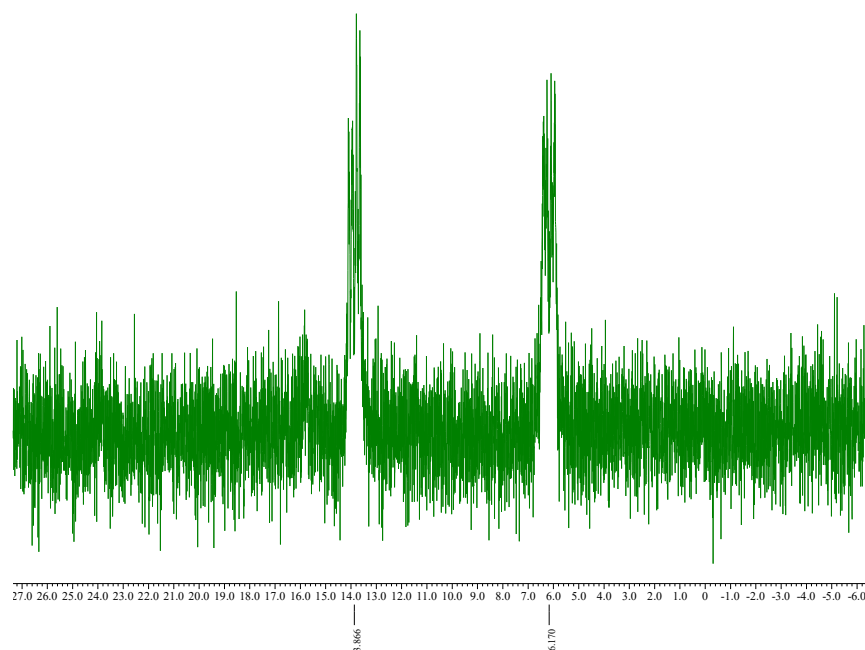

Figure S12.  $^{31}\text{P}$  NMR spectra of  $\text{A}^c$  (161.8 MHz, acetone- $d_6$ , r.t.).

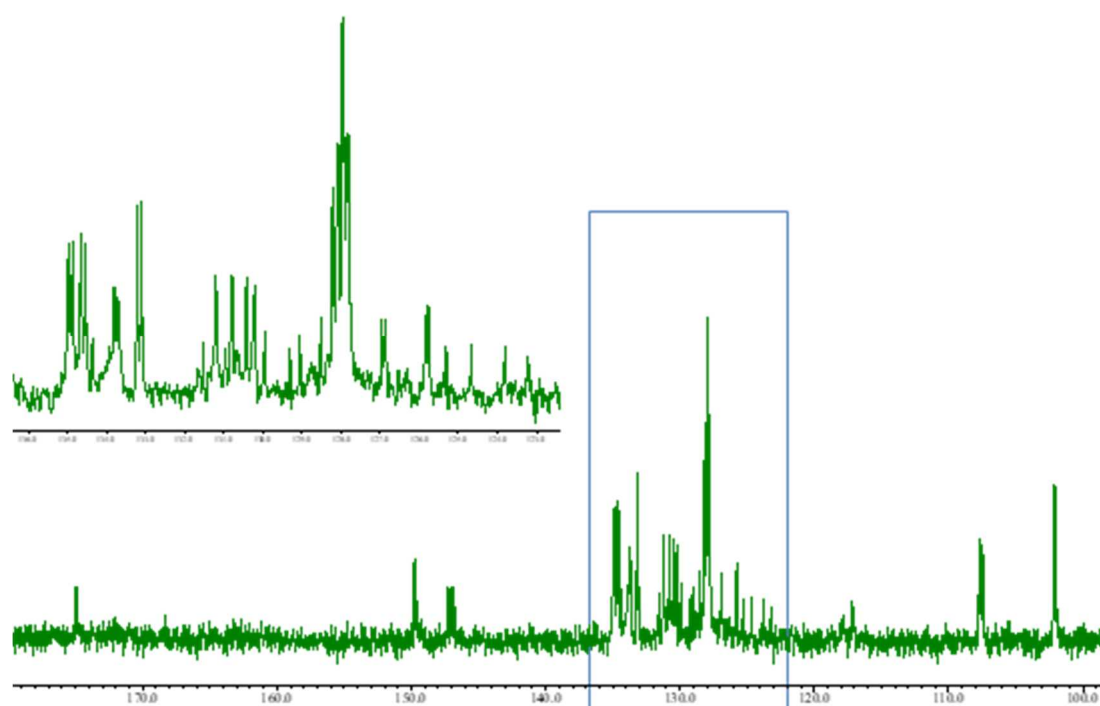

Figure S13.  $^{13}\text{C}$  NMR spectra of  $\text{A}^c$  (100 MHz, acetone- $d_6$ , r.t.).

### **X-ray Structural Determinations.**

The diffraction data of **B<sup>b</sup>** were collected on a Rigaku XtaLAB P100 diffractometer with graphite monochromated MoK $\alpha$  ( $\lambda=0.71073\text{\AA}$ ). The data were collected at a temperature of  $-180 \pm 1^\circ\text{C}$  to a maximum  $2\theta$  value of  $55.1^\circ$ . The crystal-to-detector distance was 45.00 mm. Readout was performed in the 0.172 mm pixel mode. Data were collected and processed using CrystalClear (Rigaku).<sup>1</sup> An empirical absorption correction was applied. The data were corrected for Lorentz and polarization effects.

The crystal structures were solved by direct method (SHELXS-97<sup>2</sup> or SHELXT<sup>3</sup>) and expanded using Fourier techniques, which are subsequently completed by Fourier recycling using the SHELXL 2014 program.<sup>3</sup> Non-hydrogen atoms were refined by anisotropic displacement parameters. Crystallographic data, data collection and refinement parameters for **B<sup>b</sup>** are listed in Table S1.

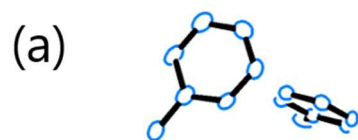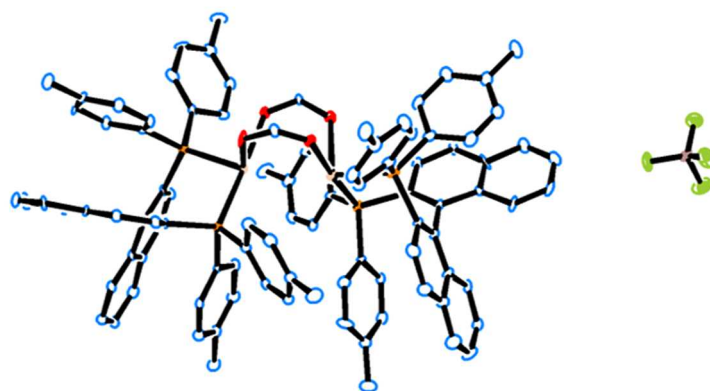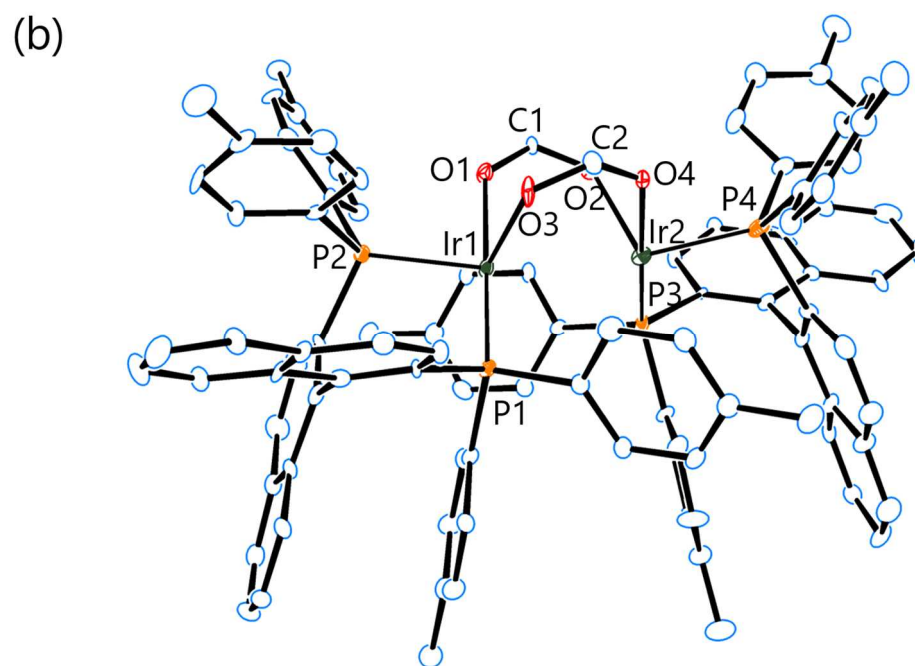

Figure S14. ORTEP diagram of complex **B<sup>b</sup>** (a) including solvent and anion, (b) cationic unit.

Table S1. Crystal data and structure refinement for **B<sup>b</sup>**.

| Complex                           | <b>B<sup>b</sup></b>                                             |
|-----------------------------------|------------------------------------------------------------------|
| Empirical formula                 | C112 H98 B F4 Ir2 O4 P4                                          |
| Formula weight                    | 2102.99                                                          |
| Temperature                       | 93(2) K                                                          |
| Wavelength                        | 0.71073 Å                                                        |
| Crystal system                    | Orthorhombic                                                     |
| Space group                       | <i>P</i> 2 <sub>1</sub> 2 <sub>1</sub> 2 <sub>1</sub>            |
| Unit cell dimensions              | a = 15.3077(3) Å<br>b = 17.0493(3) Å<br>c = 35.2582(8) Å         |
|                                   | $\alpha = 90^\circ$<br>$\beta = 90^\circ$<br>$\gamma = 90^\circ$ |
| Volume                            | 9201.9(3) Å <sup>3</sup>                                         |
| Z                                 | 4                                                                |
| Density (calculated)              | 1.518 Mg/m <sup>3</sup>                                          |
| Absorption coefficient            | 3.023 mm <sup>-1</sup>                                           |
| F(000)                            | 4228                                                             |
| Crystal size                      | 0.390 x 0.360 x 0.090 mm <sup>3</sup>                            |
| Theta range for data collection   | 2.735 to 27.499°                                                 |
| Index ranges                      | -19 ≤ h ≤ 19, -21 ≤ k ≤ 16, -45 ≤ l ≤ 43                         |
| Reflections collected             | 67280                                                            |
| Independent reflections           | 19583 [R(int) = 0.0537]                                          |
| Completeness to theta = 27.50°    | 99.6 %                                                           |
| Refinement method                 | Full-matrix least-squares on F <sup>2</sup>                      |
| Data / restraints / parameters    | 19583 / 0 / 1154                                                 |
| Goodness-of-fit on F <sup>2</sup> | 1.009                                                            |
| Final R indices [I > 2σ(I)]       | R1 = 0.0689, wR2 = 0.1663                                        |
| R indices (all data)              | R1 = 0.0726, wR2 = 0.1687                                        |
| Largest diff. peak and hole       | 13.584 and -4.386 e.Å <sup>-3</sup>                              |

(1) CrystalClear: Data Collection and Processing Software, Rigaku Corporation (1998-2015). Tokyo 196-8666, Japan.

(2) SHELXS Version 2013/1: Sheldrick, G. M. (2008). Acta Cryst. A64, 112-122.

(3) SHELXT Version 2014/5: Sheldrick, G. M. (2014). Acta Cryst. A70, C1437.

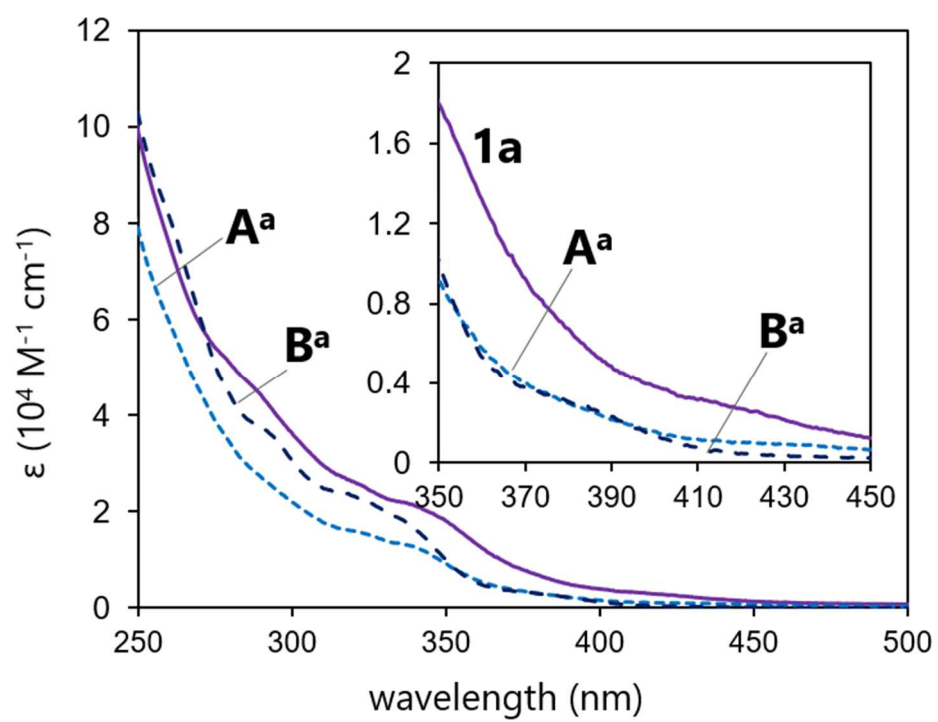

Figure S15. UV-vis absorption spectra of **1a**, **A<sup>a</sup>**, and **B<sup>a</sup>** measured in  $\text{CD}_2\text{Cl}_2$  at r.t.
